# Supplementary material
Source: publisher figshare collection journal article supplement (https://acs.figshare.com/ndownloader/files/9653911)
Supplement: Supplementary file 1 [file 9653911]

Compound,SMILES,Rat nNOS Ki (nM),Human nNOS Ki (nM),Murine iNOS Ki (nM),Human eNOS Ki (nM),n/i selectivity,hn/he selectivity,hn/rn selectivity,"PAMPA-BBB, Pe (10^(-6) cm/s)","Caco-2, Efflux ratio"
7,NC1=CC(C)=CC(CCC2=CC=CC(CCCNC)=C2)=N1,48,55,3614,20117,75,365,1.1,10.4 ± 0.75,9.2
8,NC1=CC(C)=CC(CCC2=CC(F)=CC(CCCNC)=C2)=N1,41,65,4649,39505,113,610,1.6,,
9,NC1=CC(C)=CC(CCC2=CC(C(F)(F)F)=CC(CCCNC)=C2)=N1,346,598,33690,51542,98,86.1,1.7,,
10,NC1=CC(C)=CC(CCC2=CC(C#N)=CC(CCCNC)=C2)=N1,252,516,16165,42086,64,81.5,2,,
11,NC1=CC(C)=CC(CCC2=CC=CC(CCCN(C)C)=C2)=N1,60,43,3458,20816,58,485,0.7,,
12,NC1=CC(C)=CC(CCC2=CC(F)=CC(CCCN(C)C)=C2)=N1,26,30,3857,83976,149,2799,1.2,14.8 ± 0.69,5.9
13,NC1=CC(C)=CC(CCC2=CC(C(F)(F)F)=CC(CCCN(C)C)=C2)=N1,541,NT,36017,NT,67,ND,ND,,
14,NC1=CC(C)=CC(CCC2=CC(C#N)=CC(CCCN(C)C)=C2)=N1,232,NT,16373,NT,71,ND,ND,,
15,NC1=CC(C)=CC(CCC2=CN=CC(C3=CC(NC)=CC=C3)=C2)=N1,1700,NT,6704,NT,4,ND,ND,,
16,NC1=CC(C)=CC(CCC2=CN=CC(C3=CC(CNC)=CC=C3)=C2)=N1,47,82,3005,8668,64,106,1.7,5.56 ± 0.18,69.6
17,NC1=CC(C)=CC(CCC2=CN=CC(C3=CC=C(CNC)C=C3)=C2)=N1,57,100,4213,68539,74,685,1.8,,
18,NC1=CC(C)=CC(CCC2=CC(F)=CC(C3=CC(CNC)=CC=C3)=C2)=N1,44,83,3012,19415,69,234,1.9,17.41 ± 0.50,10.9
19,NC1=CC(C)=CC(CCC2=CC(F)=CC(C3=CC=C(CNC)C=C3)=C2)=N1,185,362,10883,69888,59,193,2,,
